# Supplementary material for: Biodegradable Periodic Mesoporous Organosilica (BPMO) Loaded with Daunorubicin: A Promising Nanoparticle‐Based Anticancer Drug
Source: PubMed Central journal article supplement (PMC7187469; doi:10.1002/cmdc.201900595), 2020-02-11
Supplement: CMDC-15-593-s001.pdf [file CMDC-15-593-s001.pdf]

**CHEM**MED**CHEM**

Supporting Information

**Biodegradable Periodic Mesoporous Organosilica (BPMO)  
Loaded with Daunorubicin: A Promising Nanoparticle-  
Based Anticancer Drug**

Ngoc Xuan Dat Mai, Albane Birault, Kotaro Matsumoto, Hanh Kieu Thi Ta, Soontaree Grace Intasard, Kendall Morrison, Phan Bach Thang, Tan Le Hoang Doan, and Fuyuhiko Tamanoi\* © 2020 The Authors. Published by Wiley-VCH Verlag GmbH & Co. KGaA. This is an open access article under the terms of the Creative Commons Attribution License, which permits use, distribution and reproduction in any medium, provided the original work is properly cited.

## Author Contributions

F.T. Conceptualization:Lead; Data curation:Lead; Formal analysis:Lead; Funding acquisition:Lead; Investigation:-Lead; Methodology:Lead; Project administration:Lead; Resources:Lead; Software:Lead; Supervision:Lead; Validation:Lead; Visualization:Lead; Writing - Original Draft:Lead; Writing - Review & Editing:Lead

N.M. Conceptualization:Equal; Data curation:Equal; Formal analysis:Equal; Investigation:Equal; Writing - Original Draft:Equal; Writing - Review & Editing:Equal

A.B. Conceptualization:Equal; Data curation:Equal; Formal analysis:Equal; Investigation:Equal; Writing - Original Draft:Equal; Writing - Review & Editing:Equal

K.M. Conceptualization:Equal; Data curation:Equal; Formal analysis:Equal; Investigation:Equal; Supervision:Equal; Writing - Original Draft:Equal; Writing - Review & Editing:Equal

H.T. Data curation:Equal; Formal analysis:Equal; Investigation:Equal; Writing - Review & Editing:Equal

S.I.-a. Data curation:Equal; Formal analysis:Equal; Investigation:Equal; Writing - Review & Editing:Equal

K.M. Formal analysis:Equal; Writing - Review & Editing:Equal

P.T. Data curation:Equal; Formal analysis:Equal; Investigation:Equal; Writing - Review & Editing:Equal

T.D. Conceptualization:Equal; Data curation:Equal; Formal analysis:Equal; Funding acquisition:Equal; Investigation:Equal; Writing - Review & Editing:Equal

## Supporting Information

**Table S1.** IR band assignments of BP MO shown in Figure 1-e (<sup>1-3</sup>)

| <b>Band position [cm<sup>-1</sup>]</b> | <b>Band assignment</b>                                                     |
|----------------------------------------|----------------------------------------------------------------------------|
| 3436                                   | C-H stretching                                                             |
| 2925                                   | C-H                                                                        |
| 1269                                   | CH <sub>2</sub> wagging in -CH <sub>2</sub> -S-                            |
| 1159                                   | Si-O-Si                                                                    |
| 1103                                   | Si-O-CH <sub>2</sub> CH <sub>3</sub>                                       |
| 1035                                   | Si-O-Si                                                                    |
| 909                                    | C-H                                                                        |
| 778                                    | Si-C stretching                                                            |
| 696                                    | C-S                                                                        |
| 456                                    | Si-(O-CH <sub>2</sub> CH <sub>3</sub> ) <sub>3</sub> symmetric deformation |

**Table S2.** Average of tumor weight 3 days after injection

| <b>Sample</b>      | <b>Control</b> | <b>Free DNR</b> | <b>DNR-BP MO</b> |
|--------------------|----------------|-----------------|------------------|
| <b>Weight (mg)</b> | 55.67 ± 1.19   | 28.46 ± 2.70    | 3.03 ± 1.01      |

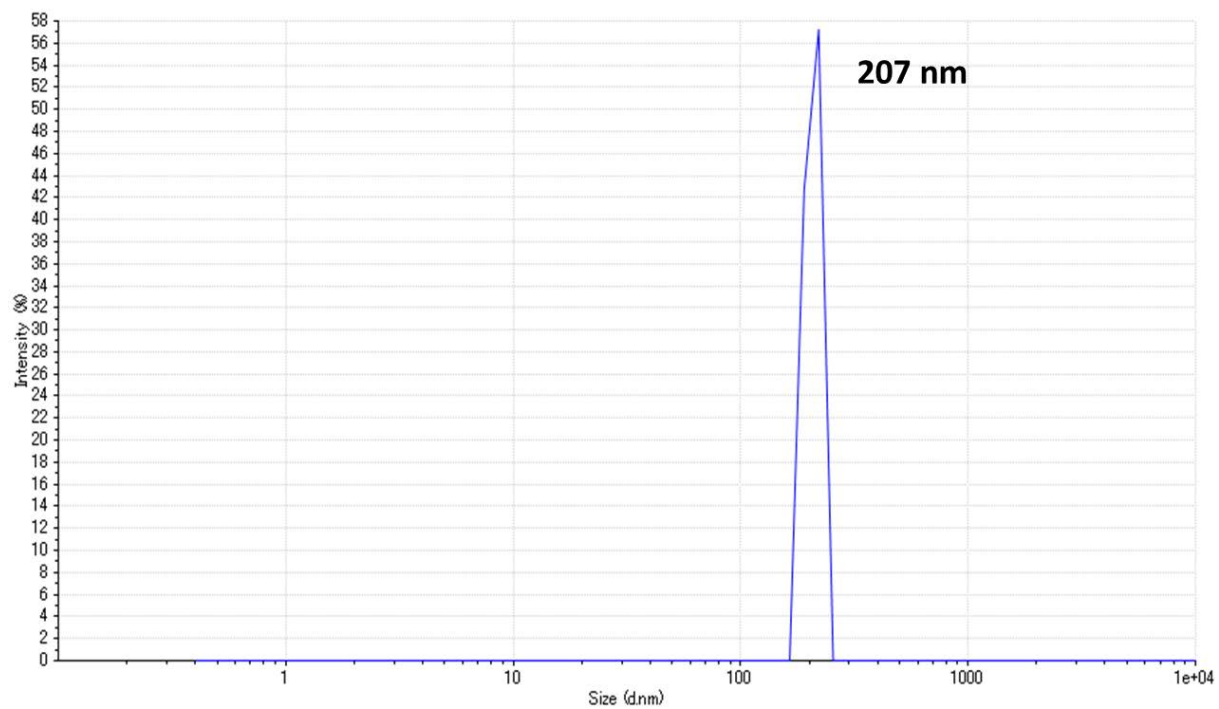

**Figure S1.** DLS of BPMO was analyzed by Zetasizer  $\mu$ V Malvern apparatus.

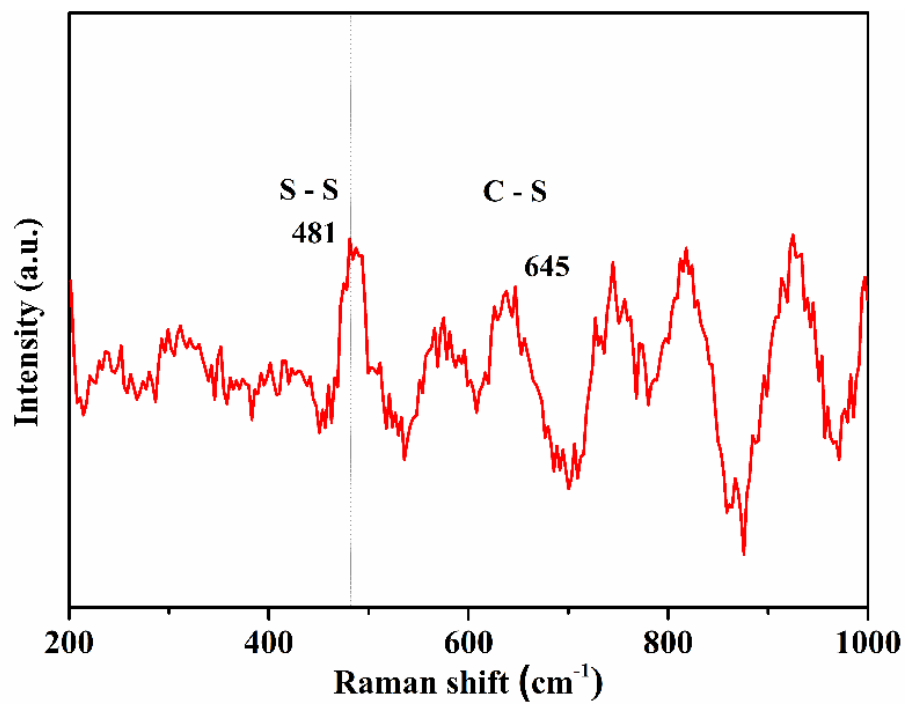

**Figure S2.** Raman spectrum of BPMO was analysed by XploRA PLUS HORIBA Scientific Raman microscope.

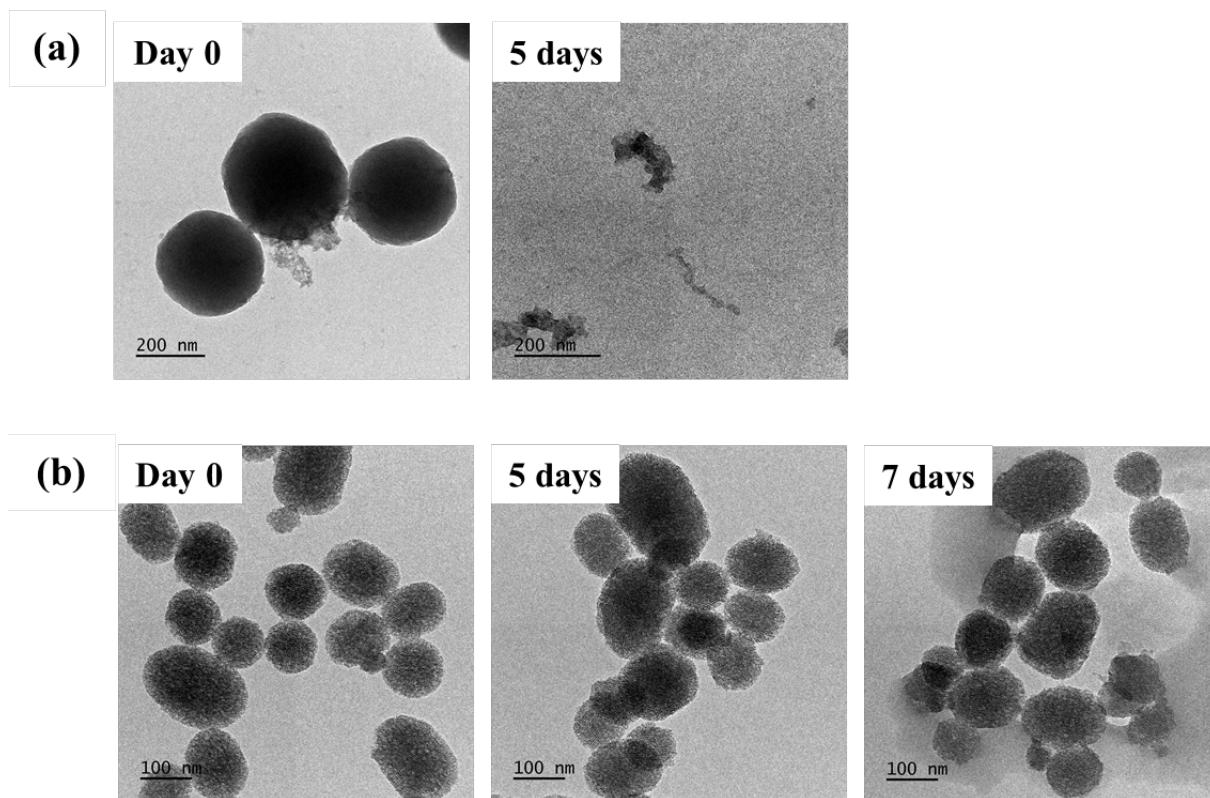

**Figure S3.** Degradation of BPMO and MSN by GSH. TEM of (a) BPMO and (b) MSN nanoparticles after dispersion in PBS with GSH (10 mM) for various times.

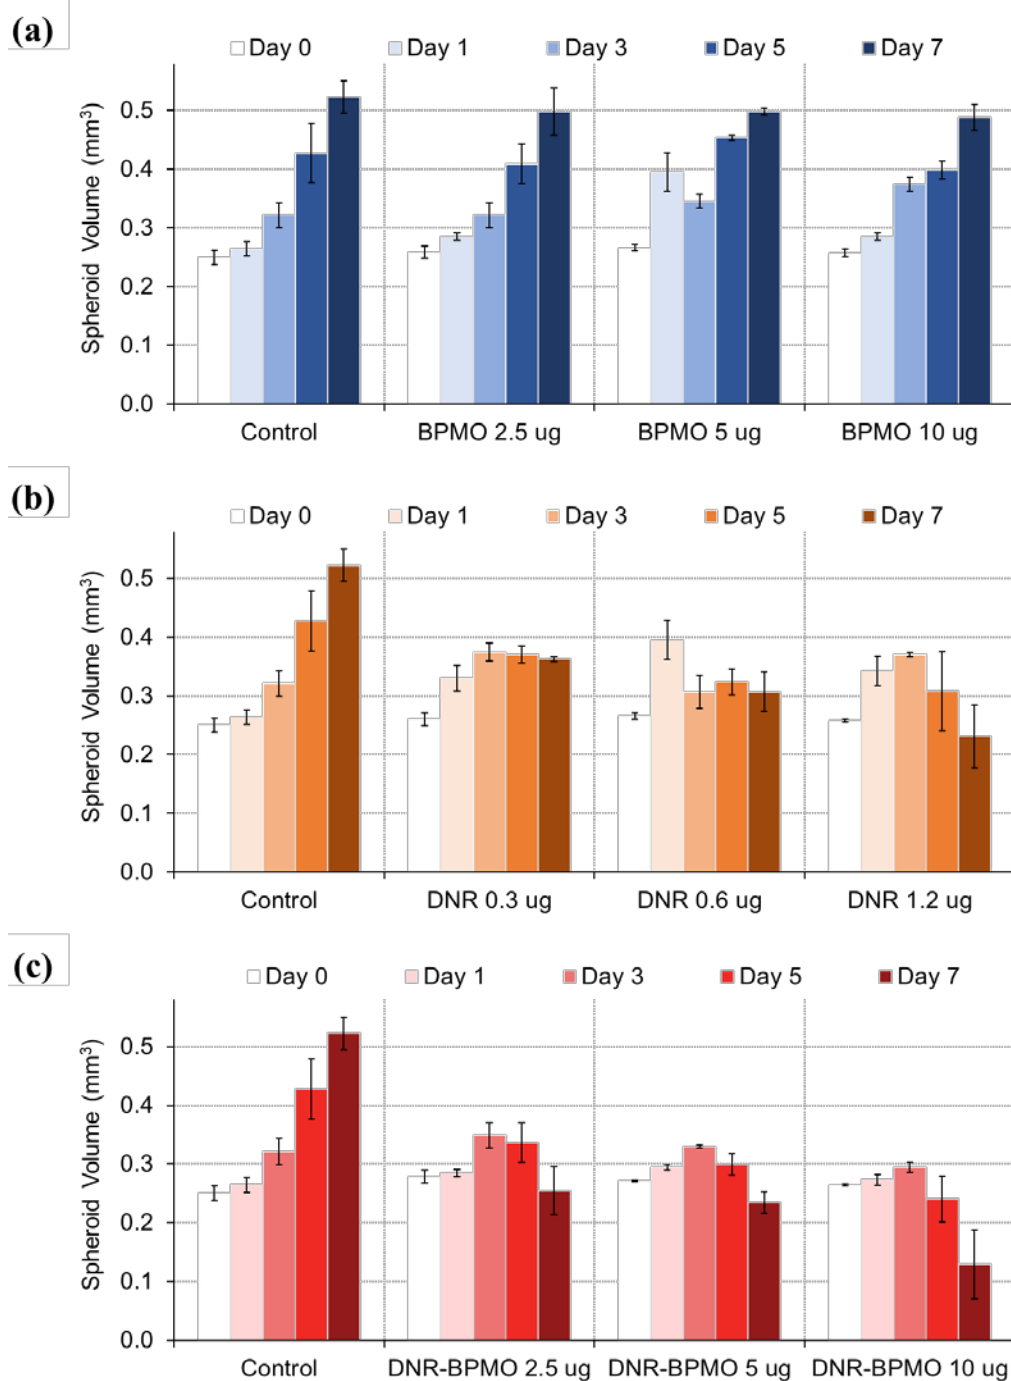

**Figure S4.** Spheroid volume calculated after treatment with no injection (Control), (a) BPMO (2.5, 5 and 10  $\mu\text{g}$ ), (b) free DNR (0.3, 0.6 and 1.2  $\mu\text{g}$ ) or (c) DNR-BPMO (2.5, 5 and 10  $\mu\text{g}$ ) for 7 days. Error bars show standard error.

## References

- [1] N. Lu, Y. Tian, W. Tian, P. Huang, Y. Liu, Y. Tang, C. Wang, S. Wang, Y. Su, Y. Zhang, J. Pan, Z. Teng, G. Lu, *ACS Appl. Mater. Interfaces*. **2016**, 8, 2985.
- [2] D. Zhu, W. J. van Ooij, *J. Adhes. Sci. Technol.* **2002**, 16, 1235.
- [3] J. H. Kim, B. Fang, M. Y. Song, J.-S. Yu, *Chem. Mat.* **2012**, 24, 2256.
